# Supplementary material for: Evaluation of Muscle Long Non-Coding RNA Profile during Rearing and Finishing Phase of Bulls Subjected to Different Prenatal Nutritional Strategies
Source: MDPI journal article supplement (doi:10.3390/ani14040652), 2024-02-18
Supplement: s1 [file s1]

**Table S1.** Genes related to epigenetic mechanisms

| <i>DNA Methyltransferases</i> |        |        |
|-------------------------------|--------|--------|
| DNMT1                         | DNMT3A | DNMT3B |

| <i>Histone Acetyltransferases</i> |       |       |       |       |       |       |       |       |
|-----------------------------------|-------|-------|-------|-------|-------|-------|-------|-------|
| ATF2                              | CDYL  | CIITA | ESCO1 | ESCO2 | HAT1  | KAT14 | KAT2A | KAT2B |
| KAT5                              | KAT6A | KAT6B | KAT7  | KAT8  | NCOA1 | NCOA3 | NCOA6 |       |

| <i>Histone Methyltransferases</i> |       |       |       |        |       |         |       |
|-----------------------------------|-------|-------|-------|--------|-------|---------|-------|
| CARM1                             | DOT1L | EHMT2 | KMT2A | KMT2C  | PRMT1 | PRMT2   | PRMT3 |
| PRMT5                             | PRMT6 | PRMT7 | PRMT8 | SETDB2 | SMYD3 | SUV39H1 |       |

| <i>SET Domain Proteins (Histone Methyltransferase Activity)</i> |       |       |       |       |       |        |         |        |
|-----------------------------------------------------------------|-------|-------|-------|-------|-------|--------|---------|--------|
| ASH1L                                                           | KMT2C | KMT2E | KMT5A | KMT5B | NSD1  | NSD2   | SETD1A  | SETD1B |
| SETD2                                                           | SETD3 | SETD4 | SETD5 | SETD6 | SETD7 | SETDB1 | SUV39H1 |        |

| <i>Histone Phosphorylation</i> |       |       |      |      |         |         |
|--------------------------------|-------|-------|------|------|---------|---------|
| AURKA                          | AURKB | AURKC | NEK6 | PAK1 | RPS6KA3 | RPS6KA5 |

| <i>Histone Ubiquitination</i> |       |      |       |       |       |       |       |       |
|-------------------------------|-------|------|-------|-------|-------|-------|-------|-------|
| DZIP3                         | MYSM1 | RNF2 | RNF20 | UBE2A | UBE2B | USP16 | USP21 | USP22 |

| <i>DNA &amp; Histone Demethylases</i> |       |       |       |       |       |      |
|---------------------------------------|-------|-------|-------|-------|-------|------|
| KDM1A                                 | KDM4A | KDM4C | KDM5B | KDM5C | KDM6B | MBD2 |

| <i>Histone Deacetylases</i> |        |        |       |       |       |
|-----------------------------|--------|--------|-------|-------|-------|
| HDAC1                       | HDAC10 | HDAC11 | HDAC2 | HDAC3 | HDAC4 |
| HDAC5                       | HDAC6  | HDAC7  | HDAC8 | HDAC9 |       |

| <i>SWI / SNF Complex Components</i> |       |       |         |         |
|-------------------------------------|-------|-------|---------|---------|
| ARID1A                              | INO80 | PBRM1 | SMARCA2 | SMARCA4 |
